# Supplementary material
Source: Springer Nature journal article supplement (https://www.springermedizin.de/resource/supplementary/12957_2012_1186_MOESM1_ESM.pdf/9561874)

**A**BP: 1157.0  
ST: 5.0  
**11**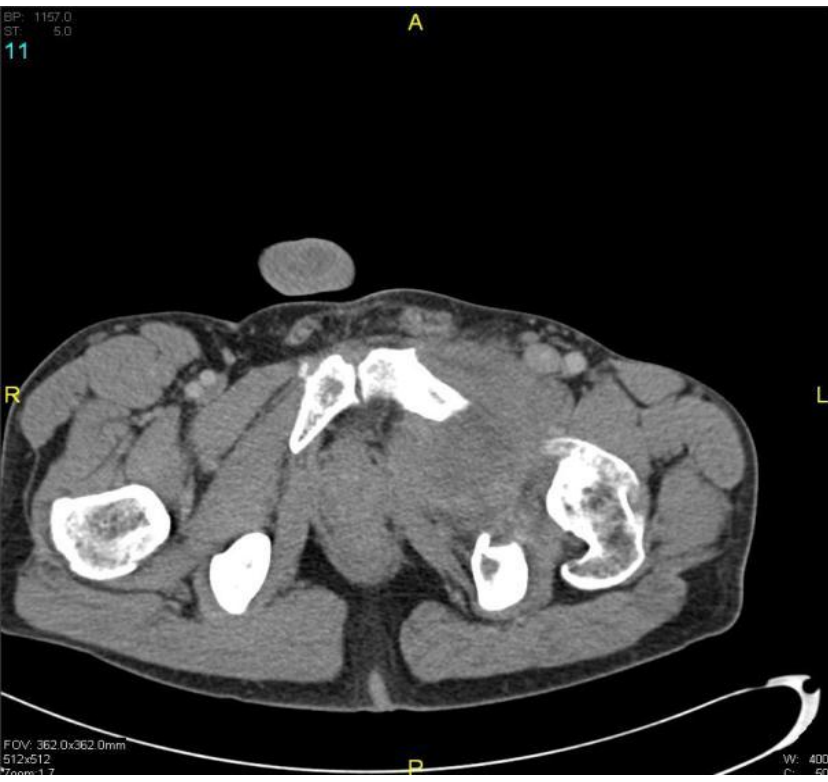**B**BP: 1118.0  
ST: 5.0  
**86**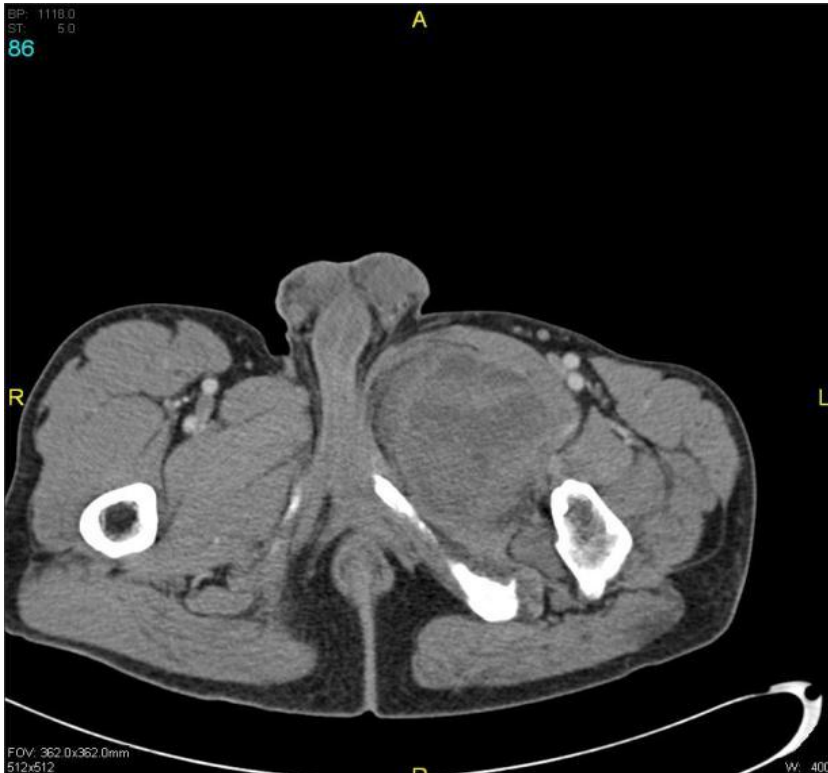

Supplement: MOESM1 [file 9561874]
